# Supplementary material
Source: PubMed Central journal article supplement (PMC3209406)
Supplement: supp_85.23.12146_TableS1.pdf [file supp_85.23.12146_TableS1.pdf]

Supplemental Table 1. GenBank Sequence Database accession numbers for strains used in phylogenetic trees (Figure 2). Strains are listed in the order that their text labels appear in Figure 2, clockwise from top center for each tree.

| <b>Virus</b> | <b>Strain Name</b>         | <b>GenBank Accession No.</b> |
|--------------|----------------------------|------------------------------|
| hPIV1        | Washington/1957 (C39)      | X55803                       |
| hPIV1        | Washington/1957 (C35)      | M31228                       |
| hPIV1        | Houston/1982 Isolate A     | U01075                       |
| hPIV1        | Houston/1981 Isolate B     | U01074                       |
| hPIV1        | Houston/1985 Isolate A     | U01079                       |
| hPIV1        | Chapel Hill/1983 Isolate B | M86791                       |
| hPIV1        | Chapel Hill/1970           | M86784                       |
| hPIV1        | Houston/1987               | U01081                       |
| hPIV1        | Chapel Hill/1983 Isolate A | M86790                       |
| hPIV1        | Oklahoma/4409/2010         | JN089925                     |
| hPIV1        | Milwaukee/51/1991          | U70938                       |
| hPIV1        | Milwaukee/49/1991          | U70937                       |
| hPIV1        | Milwaukee/63/1991          | U70947                       |
| hPIV1        | Milwaukee/64/1991          | U70948                       |
| hPIV1        | Milwaukee/48/1991          | U70936                       |
| hPIV1        | Milwaukee/60/1991          | U70944                       |
| hPIV1        | Houston/1985 Isolate B     | U01080                       |
| hPIV1        | Houston/1983 Isolate B     | U01078                       |
| hPIV1        | Houston/1988               | U01082                       |
| hPIV1        | Houston/1989 Isolate A     | U01083                       |
| hPIV1        | Houston/1983 Isolate A     | U01077                       |
| hPIV1        | Houston/1982 Isolate B     | U01076                       |
| hPIV1        | Houston/1981 Isolate A     | U01073                       |
| hPIV1        | Chapel Hill/1979 Isolate B | M86789                       |
| hPIV1        | Chapel Hill/1979 Isolate A | M86788                       |
| hPIV1        | Chapel Hill/1977           | M86787                       |
| hPIV1        | Houston/1989 Isolate C     | U01085                       |
| hPIV1        | Milwaukee/52/1991          | U70939                       |
| hPIV1        | Milwaukee/62/1991          | U70946                       |
| hPIV1        | Houston/1989 Isolate B     | U01084                       |
| hPIV1        | Milwaukee/54/1991          | U70941                       |
| hPIV1        | Milwaukee/61/1991          | U70945                       |
| hPIV1        | Milwaukee/53/1991          | U70940                       |
| hPIV1        | Milwaukee/58/1991          | U70943                       |
| hPIV1        | Milwaukee/55/1991          | U70942                       |
| hPIV1        | Chapel Hill/1973 Isolate B | M86786                       |
| hPIV1        | Chapel Hill/1973 Isolate A | M86785                       |
| hPIV1        | Chapel Hill/1981 Isolate B | M86783                       |
| hPIV1        | Chapel Hill/1981 Isolate A | M86782                       |
| hPIV1        | Chapel Hill/1980           | M86781                       |

|       |                                                            |          |
|-------|------------------------------------------------------------|----------|
| hPIV1 | Chapel Hill/1966                                           | M86780   |
| hPIV1 | Washington/1964                                            | AF457102 |
| hPIV2 | Nara Japan/1986 (86-391)                                   | AB189949 |
| hPIV2 | Nara Japan/1986 (76-86)                                    | AB189950 |
| hPIV2 | Vanderbilt/1994 (V9412-6)                                  | AF213352 |
| hPIV2 | Vanderbilt/1994 (V94)                                      | AF533010 |
| hPIV2 | Oklahoma/283/2009                                          | JF912195 |
| hPIV2 | Lyon/26056/1997                                            | DQ072589 |
| hPIV2 | Lyon/20435/2001                                            | DQ072588 |
| hPIV2 | Lyon/20283/2001                                            | DQ072587 |
| hPIV2 | Lyon/18620/2001                                            | DQ072586 |
| hPIV2 | Nara Japan/1980 (4-80)                                     | AB189951 |
| hPIV2 | Oklahoma/3955/2005                                         | JF912196 |
| hPIV2 | Tokyo/1986 (TC-6558)                                       | AB189953 |
| hPIV2 | Tokyo/1986 (TC-6482)                                       | AB189952 |
| hPIV2 | Riyadh/105/2009                                            | HM460888 |
| hPIV2 | London/Year Unknown                                        | D00865   |
| hPIV2 | Ohio/1955 (Greer J-1)                                      | AB367954 |
| hPIV2 | Ohio/1955 (Greer)                                          | AF533012 |
| hPIV2 | Oklahoma/94/2009                                           | JF912194 |
| hPIV2 | Tokyo/1962 (62-M786)                                       | AB189948 |
| hPIV2 | Vanderbilt/1998 (V98)                                      | AF533011 |
| hPIV2 | Toshiba USA/1957                                           | X57559   |
| hPIV3 | New Delhi/322/2006                                         | EU814623 |
| hPIV3 | Texas/9305/1982                                            | M18763   |
| hPIV3 | Washington/1511/1973                                       | M18759   |
| hPIV3 | Washington/649/1979                                        | M18761   |
| hPIV3 | West Virginia/1980 or 1981 (JS)                            | Z11575   |
| hPIV3 | Texas/12677/1983                                           | M18764   |
| hPIV3 | Texas/545/1980                                             | M18762   |
| hPIV3 | Montreal/Year Unknown (14702)                              | EU424062 |
| hPIV3 | Toronto/1993                                               | Z26523   |
| hPIV3 | Australia/Year Unknown                                     | AY283063 |
| hPIV3 | Australia/124854/1974                                      | M18760   |
| hPIV3 | Washington/1957 (C243)                                     | JN089924 |
| hPIV3 | Washington/1957 (47885)                                    | M21649   |
| hPIV3 | South Africa/1963                                          | HM583801 |
| hPIV3 | Japan/2004 (BRD)                                           | AB189961 |
| hPIV3 | Lanzhou China/2003 (LZ22)                                  | FJ455842 |
| hPIV3 | Guangzhou China/Year Unknown<br>(possibly 2001) (ZHYMgz01) | EU326526 |
| hPIV3 | New Delhi/139/2005                                         | EU814626 |
| hPIV3 | Oklahoma/410/2009                                          | JF912197 |
| hPIV3 | Oklahoma/754/2009                                          | JF912198 |
| hPIV3 | Japan/2004 (KK24)                                          | AB189960 |

|       |                    |          |
|-------|--------------------|----------|
| hPIV3 | New Delhi/w32/2005 | EU814625 |
| hPIV3 | New Delhi/88/2006  | EU814624 |
| hPIV3 | Riyadh/149/2009    | HM460887 |
| hPIV3 | Riyadh/11/2008     | HM460886 |
