# Supplementary material
Source: PubMed Central journal article supplement (PMC3209406)
Supplement: supp_85.23.12146_TableS2.pdf [file supp_85.23.12146_TableS2.pdf]

Table S2. Glycan Structures with their ID numbers, by Array Version (Key for Figure 6A-D).

| Glycan No. |        |        | Structure                                                                                                                                                                                           |
|------------|--------|--------|-----------------------------------------------------------------------------------------------------------------------------------------------------------------------------------------------------|
| v. 3.2     | v. 4.1 | v. 4.2 |                                                                                                                                                                                                     |
| 44         | 45     | 45     | Neu5Ac $\alpha$ 2-3[6OSO3]Gal $\beta$ 1-4GlcNAc $\beta$ -Sp8                                                                                                                                        |
|            | 54     | 54     | Neu5Ac $\alpha$ 2-6Gal $\beta$ 1-4GlcNAc $\beta$ 1-2Man $\alpha$ 1-3(Neu5Ac $\alpha$ 2-6Gal $\beta$ 1-4GlcNAc $\beta$ 1-2Man $\alpha$ 1-6)Man $\beta$ 1-4GlcNAc $\beta$ 1-4GlcNAc $\beta$ -N(LT)AVL |
| 54         | 55     |        | Neu5Ac $\alpha$ 2-6Gal $\beta$ 1-4GlcNAc $\beta$ 1-2Man $\alpha$ 1-3(Neu5Ac $\alpha$ 2-6Gal $\beta$ 1-4GlcNAc $\beta$ 1-2Man $\alpha$ 1-6)Man $\beta$ 1-4GlcNAc $\beta$ 1-4GlcNAc $\beta$ -Sp8      |
| 53         | 56     | 55     | Neu5Ac $\alpha$ 2-6Gal $\beta$ 1-4GlcNAc $\beta$ 1-2Man $\alpha$ 1-3(Neu5Ac $\alpha$ 2-6Gal $\beta$ 1-4GlcNAc $\beta$ 1-2Man $\alpha$ 1-6)Man $\beta$ 1-4GlcNAc $\beta$ 1-4GlcNAc $\beta$ -Sp12     |
| 52         | 57     | 56     | Neu5Ac $\alpha$ 2-6Gal $\beta$ 1-4GlcNAc $\beta$ 1-2Man $\alpha$ 1-3(Neu5Ac $\alpha$ 2-6Gal $\beta$ 1-4GlcNAc $\beta$ 1-2Man $\alpha$ 1-6)Man $\beta$ 1-4GlcNAc $\beta$ 1-4GlcNAc $\beta$ -Sp13     |
| 201        | 221    | 220    | Neu5Ac $\alpha$ 2-3Gal $\beta$ 1-3GalNAc $\alpha$ -Sp8                                                                                                                                              |
| 314        | 222    | 221    | Neu5Ac $\alpha$ 2-3Gal $\beta$ 1-3GalNAc $\alpha$ -Sp14                                                                                                                                             |
| 207        | 228    | 227    | Neu5Ac $\alpha$ 2-3(6-O-Su)Gal $\beta$ 1-4(Fuc $\alpha$ 1-3)GlcNAc $\beta$ -Sp8                                                                                                                     |
| 208        | 229    | 228    | Neu5Ac $\alpha$ 2-3(GalNAc $\beta$ 1-4)Gal $\beta$ 1-4GlcNAc $\beta$ -Sp0                                                                                                                           |
| 209        | 230    | 229    | Neu5Ac $\alpha$ 2-3(GalNAc $\beta$ 1-4)Gal $\beta$ 1-4GlcNAc $\beta$ -Sp8                                                                                                                           |
| 210        | 231    | 230    | Neu5Ac $\alpha$ 2-3(GalNAc $\beta$ 1-4)Gal $\beta$ 1-4Glc $\beta$ -Sp0                                                                                                                              |
| 214        | 235    | 234    | Neu5Ac $\alpha$ 2-3GalNAc $\beta$ 1-4GlcNAc $\beta$ -Sp0                                                                                                                                            |
| 215        | 236    | 235    | Neu5Ac $\alpha$ 2-3Gal $\beta$ 1-3[6OSO3]GlcNAc $\beta$ -Sp8                                                                                                                                        |
| 216        | 237    | 236    | Neu5Ac $\alpha$ 2-3Gal $\beta$ 1-3(Fuc $\alpha$ 1-4)GlcNAc $\beta$ -Sp8                                                                                                                             |
| 217        | 238    | 237    | Neu5Ac $\alpha$ 2-3Gal $\beta$ 1-3(Fuc $\alpha$ 1-4)GlcNAc $\beta$ 1-3Gal $\beta$ 1-4(Fuc $\alpha$ 1-3)GlcNAc $\beta$ -Sp0                                                                          |
| 218        | 239    | 238    | Neu5Ac $\alpha$ 2-3Gal $\beta$ 1-3(Neu5Ac $\alpha$ 2-3Gal $\beta$ 1-4)GlcNAc $\beta$ -Sp8                                                                                                           |
| 219        | 240    | 239    | Neu5Ac $\alpha$ 2-3Gal $\beta$ 1-3[6OSO3]GalNAc $\alpha$ -Sp8                                                                                                                                       |
| 220        | 241    | 240    | Neu5Ac $\alpha$ 2-3Gal $\beta$ 1-3(Neu5Ac $\alpha$ 2-6)GalNAc $\alpha$ -Sp8                                                                                                                         |
| 313        | 242    | 241    | Neu5Ac $\alpha$ 2-3Gal $\beta$ 1-3(Neu5Ac $\alpha$ 2-6)GalNAc $\alpha$ -Sp14                                                                                                                        |
| 223        | 245    | 244    | Neu5Ac $\alpha$ 2-3Gal $\beta$ 1-3GlcNAc $\beta$ 1-3Gal $\beta$ 1-4GlcNAc $\beta$ -Sp0                                                                                                              |
| 224        | 247    | 246    | Neu5Ac $\alpha$ 2-3Gal $\beta$ 1-3GlcNAc $\beta$ -Sp0                                                                                                                                               |
| 225        | 248    | 247    | Neu5Ac $\alpha$ 2-3Gal $\beta$ 1-3GlcNAc $\beta$ -Sp8                                                                                                                                               |
| 227        | 250    | 248    | Neu5Ac $\alpha$ 2-3Gal $\beta$ 1-4(Fuc $\alpha$ 1-3)[6OSO3]GlcNAc $\beta$ -Sp8                                                                                                                      |
| 228        | 251    | 250    | Neu5Ac $\alpha$ 2-3Gal $\beta$ 1-4(Fuc $\alpha$ 1-3)GlcNAc $\beta$ 1-3Gal $\beta$ 1-4(Fuc $\alpha$ 1-3)GlcNAc $\beta$ 1-3Gal $\beta$ 1-4(Fuc $\alpha$ 1-3)GlcNAc $\beta$ -Sp0                       |
| 229        | 252    | 251    | Neu5Ac $\alpha$ 2-3Gal $\beta$ 1-4(Fuc $\alpha$ 1-3)GlcNAc $\beta$ -Sp0                                                                                                                             |
| 230        | 253    | 252    | Neu5Ac $\alpha$ 2-3Gal $\beta$ 1-4(Fuc $\alpha$ 1-3)GlcNAc $\beta$ -Sp8                                                                                                                             |
| 231        | 254    | 253    | Neu5Ac $\alpha$ 2-3Gal $\beta$ 1-4(Fuc $\alpha$ 1-3)GlcNAc $\beta$ 1-3Gal $\beta$ -Sp8                                                                                                              |
| 232        | 255    | 254    | Neu5Ac $\alpha$ 2-3Gal $\beta$ 1-4(Fuc $\alpha$ 1-3)GlcNAc $\beta$ 1-3Gal $\beta$ 1-4GlcNAc $\beta$ -Sp8                                                                                            |
| 234        | 256    | 255    | Neu5Ac $\alpha$ 2-3Gal $\beta$ 1-4GlcNAc $\beta$ 1-3Gal $\beta$ 1-4GlcNAc $\beta$ 1-3Gal $\beta$ 1-4GlcNAc $\beta$ -Sp0                                                                             |
| 235        | 257    | 256    | Neu5Ac $\alpha$ 2-3Gal $\beta$ 1-4GlcNAc $\beta$ -Sp0                                                                                                                                               |
| 236        | 258    | 257    | Neu5Ac $\alpha$ 2-3Gal $\beta$ 1-4GlcNAc $\beta$ -Sp8                                                                                                                                               |
| 237        | 259    | 258    | Neu5Ac $\alpha$ 2-3Gal $\beta$ 1-4GlcNAc $\beta$ 1-3Gal $\beta$ 1-4GlcNAc $\beta$ -Sp0                                                                                                              |

|     |     |     |                                                                                                     |
|-----|-----|-----|-----------------------------------------------------------------------------------------------------|
| 238 | 261 | 260 | Neu5Aca2-3Galβ1-4Glcβ-Sp0                                                                           |
| 239 | 262 | 261 | Neu5Aca2-3Galβ1-4Glcβ-Sp8                                                                           |
| 240 | 263 | 262 | Neu5Aca2-6GalNAca-Sp8                                                                               |
| 241 | 264 | 263 | Neu5Aca2-6GalNAcβ1-4GlcNAcβ-Sp0                                                                     |
| 242 | 265 | 264 | Neu5Aca2-6Galβ1-4[6OSO3]GlcNAcβ-Sp8                                                                 |
| 243 | 266 | 265 | Neu5Aca2-6Galβ1-4GlcNAcβ-Sp0                                                                        |
| 244 | 267 | 266 | Neu5Aca2-6Galβ1-4GlcNAcβ-Sp8                                                                        |
| 245 | 268 | 267 | Neu5Aca2-6Galβ1-4GlcNAcβ1-3Galβ1-4(Fuca1-3)GlcNAcβ1-3Galβ1-4(Fuca1-3)GlcNAcβ-Sp0                    |
| 246 | 269 | 268 | Neu5Aca2-6Galβ1-4GlcNAcβ1-3Galβ1-4GlcNAcβ-Sp0                                                       |
| 247 | 271 | 269 | Neu5Aca2-6Galβ1-4Glcβ-Sp0                                                                           |
| 249 | 272 | 271 | Neu5Aca2-6Galβ-Sp8                                                                                  |
| 256 | 278 | 277 | Neu5Gca2-3Galβ1-4(Fuca1-3)GlcNAcβ-Sp0                                                               |
| 255 | 279 | 278 | Neu5Gca2-3Galβ1-3GlcNAcβ-Sp0                                                                        |
| 257 | 281 | 280 | Neu5Gca2-3Galβ1-4GlcNAcβ-Sp0                                                                        |
| 258 | 282 | 281 | Neu5Gca2-3Galβ1-4Glcβ-Sp0                                                                           |
| 274 | 286 | 285 | Galβ1-3(Neu5Aca2-3Galβ1-4GlcNAcβ1-6)GalNAca-Sp14                                                    |
| 281 | 292 | 291 | Neu5Aca2-3Galβ1-3GlcNAcβ1-3Galβ1-3GlcNAcβ-Sp0                                                       |
| 282 | 293 | 292 | Neu5Aca2-3Galβ1-4GlcNAcβ1-3Galβ1-3GlcNAcβ-Sp0                                                       |
| 290 | 297 | 296 | Galβ1-3(Neu5Aca2-3Galβ1-4(Fuca1-3)GlcNAcβ1-6)GalNAca-Sp14                                           |
| 292 | 299 | 298 | Galβ1-4GlcNAcβ1-2Manα1-3(Neu5Aca2-6Galβ1-4GlcNAcβ1-2Manα1-6)Manβ1-4GlcNAcβ1-4GlcNAcβ-Sp12           |
| 301 | 306 | 305 | GlcNAcβ1-2Manα1-3(Neu5Aca2-6Galβ1-4GlcNAcβ1-2Manα1-6)Manβ1-4GlcNAcβ1-4GlcNAcβ-Sp12                  |
| 303 | 307 | 306 | GlcNAcβ1-3Man-Sp10                                                                                  |
| 312 | 315 | 314 | Neu5Aca2-3Galβ1-3(Neu5Aca2-3Galβ1-4GlcNAcβ1-6)GalNAca-Sp14                                          |
| 315 | 316 | 315 | Neu5Aca2-3Galβ1-4GlcNAcβ1-2Manα1-3(Neu5Aca2-6Galβ1-4GlcNAcβ1-2Manα1-6)Manβ1-4GlcNAcβ1-4GlcNAcβ-Sp12 |
| 316 | 317 | 316 | Neu5Aca2-6Galβ1-4GlcNAcβ1-2Manα1-3(Galβ1-4GlcNAcβ1-2Manα1-6)Manβ1-4GlcNAcβ1-4GlcNAcβ-Sp12           |
| 317 | 318 | 317 | Neu5Aca2-6Galβ1-4GlcNAcβ1-2Manα1-3(GlcNAcβ1-2Manα1-6)Manβ1-4GlcNAcβ1-4GlcNAcβ-Sp12                  |
|     | 323 | 322 | Neu5Aca2-3Galβ1-4GlcNAcβ1-2Manα1-3(Neu5Aca2-3Galβ1-4GlcNAcβ1-2Manα1-6)Manβ1-4GlcNAcβ1-4GlcNAcβ-Sp12 |
|     | 324 | 323 | Neu5Aca2-6Galβ1-4GlcNAcβ1-2Manα1-3(Neu5Aca2-3Galβ1-4GlcNAcβ1-2Manα1-6)Manβ1-4GlcNAcβ1-4GlcNAcβ-Sp12 |
| 324 | 328 | 327 | Neu5Aca2-6Galβ1-4GlcNAcβ1-3Galβ1-3GlcNAcβ-Sp0                                                       |
| 326 | 330 | 329 | Neu5Aca2-6Galβ1-4GlcNAcβ1-3Galβ1-4GlcNAcβ1-3Galβ1-4GlcNAcβ-Sp0                                      |
| 339 | 343 | 342 | Manα1-3(Neu5Aca2-6Galβ1-4GlcNAcβ1-2Manα1-6)Manβ1-4GlcNAcβ1-4GlcNAc-Sp12                             |
| 345 | 344 | 343 | Neu5Aca2-6Galβ1-4GlcNAcβ1-2Manα1-3(Manα1-6)Manβ1-4GlcNAcβ1-4GlcNAc-Sp12                             |

|     |     |     |                                                                                                             |
|-----|-----|-----|-------------------------------------------------------------------------------------------------------------|
| 344 | 345 | 344 | Neu5Aca2-6Galβ1-4GlcNAcβ1-2Manα1-6Manβ1-4GlcNAcβ1-4GlcNAc-Sp12                                              |
| 331 |     |     | (Neu5Aca2-3-Galβ1-3)((Neu5Aca2-3-Galβ1-4(Fuca1-3))GlcNAcβ1-6)GalNAc-Sp14                                    |
| 351 | 355 | 353 | KDNα2-3Galβ1-4(Fuca1-3)GlcNAc-Sp0                                                                           |
| 361 | 365 | 363 | Neu5Aca2-6GlcNAcβ1-4GlcNAc-Sp21                                                                             |
| 362 | 366 | 364 | Neu5Aca2-6GlcNAcβ1-4GlcNAcβ1-4GlcNAc-Sp21                                                                   |
| 371 | 375 | 373 | NeuAca2-3Galβ1-4GlcNAcβ1-3GalNAc-Sp14                                                                       |
|     | 409 | 407 | Neu5Aca2-6Galβ1-3GlcNAcβ1-3(Galβ1-4GlcNAcβ1-6)Galβ1-4Glc-Sp21                                               |
|     | 441 | 439 | Neu5Aca2-3Galβ1-4GlcNAcβ1-3Galβ-Sp8                                                                         |
|     |     | 472 | Neu5Aca2-3Galβ1-4GlcNAcβ1-6GalNAca-Sp14                                                                     |
|     |     | 476 | Neu5Aca2-3Galβ1-4GlcNAcβ1-2Manα1-6(Neu5Aca2-3Galβ1-4GlcNAcβ1-2Manα1-3)Manβ1-4GlcNAcβ1-4(Fuca1-6)GlcNAcβ-6AA |
